# Supplementary material for: Solution-processable star-shaped small molecules for efficient organic RRAM by induced conductive filament mechanism
Source: Royal Society of Chemistry journal article supplement (doi:10.1039/d2tc03867f), 2022-01-01
Supplement: d2tc03867f1.pdf [file d2tc03867f1.pdf]

## Supporting Information

### **Solution-processable star-shaped small molecules for efficient organic RRAM by induced conductive filament mechanism**

Lingling Yao,<sup>‡a,b,c</sup> Xiaozhe Cheng,<sup>‡a,b,c</sup> Weizhen Xia,<sup>‡a,b,c</sup> Liang Zhao,<sup>a,b,c</sup> Zhitao Dou,<sup>b,c</sup> Haibin

Xue,<sup>a</sup> Hong Lian,<sup>\*a,b,c</sup> Yongquan Qu,<sup>a</sup> and Qingchen Dong<sup>\*a,b,c</sup>

<sup>a</sup> MOE Key Laboratory of Interface Science and Engineering in Advanced Materials, Taiyuan University of Technology, 79 Yingze West Street, Taiyuan, 030024, China.

<sup>b</sup> MOE Key Laboratory of Advanced Display and System Applications, Shanghai University, 149 Yanchang Road, Jingan District, Shanghai 200072, China

<sup>c</sup> School of Mechanical & Electronic Engineering and Automation, Shanghai University, 99 Shangda Road, Baoshan District, Shanghai 200444, China

<sup>‡</sup> These people contribute equally to this work.

\*Correspondence: [qdong@shu.edu.cn](mailto:qdong@shu.edu.cn) (Q.D.)

## Table of Contents

|                                                                                                                         |    |
|-------------------------------------------------------------------------------------------------------------------------|----|
| 1. Retested I–V curves of all memory devices after a period of one-month.....                                           | S3 |
| 2. The statistical analysis of the data of reproducibility and current distribution of devices.....                     | S3 |
| 3. The relationship of cell area and current in LRS and HRS.....                                                        | S4 |
| 4. The photophysical properties for BPPT, TPPT, TPPA, <sup>t</sup> Bu-TPPT and <sup>t</sup> Bu-TPPA.....                | S4 |
| 5. Photophysical and electrochemical properties of BPPT, TPPT, TPPA, <sup>t</sup> Bu-TPPT and <sup>t</sup> Bu-TPPA..... | S4 |
| 6. Statistic results of the star-shaped molecules-based memory devices.....                                             | S5 |

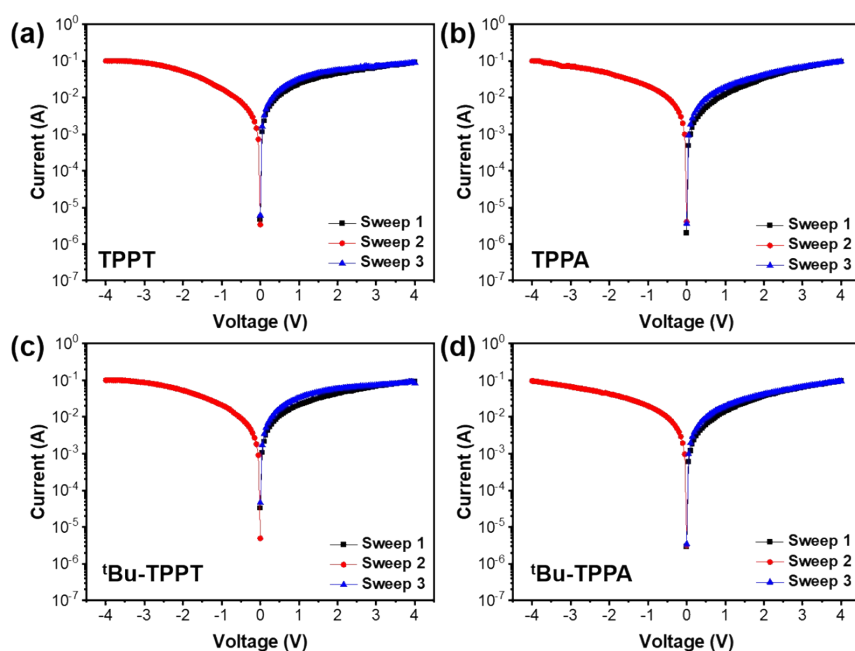

**Fig. S1** Retested I–V curves of all memory devices after a period of one-month for (a) TPPT, (b) TPPA, (c) <sup>t</sup>Bu-TPPT and (d) <sup>t</sup>Bu-TPPA, respectively.

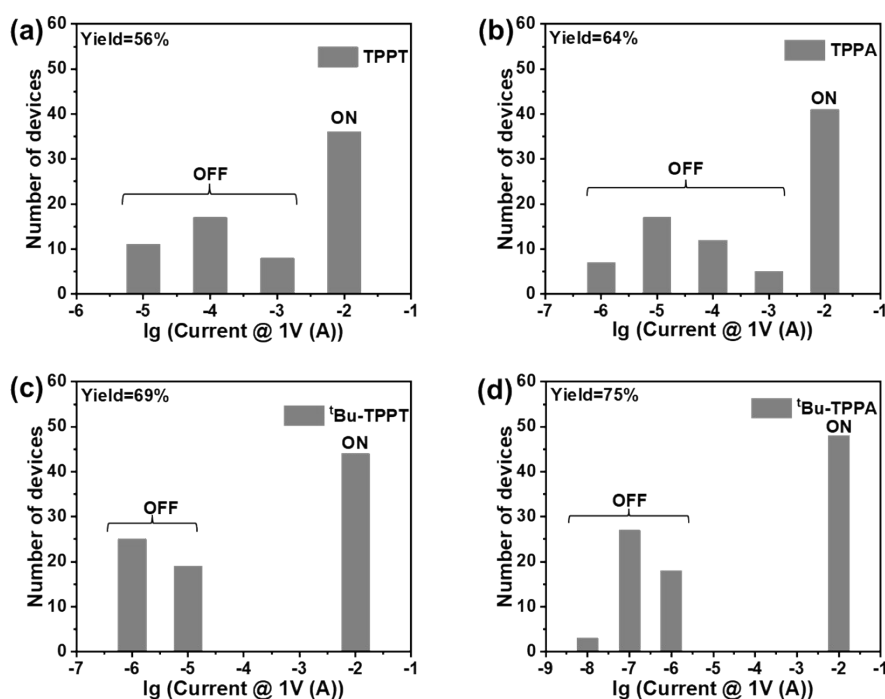

**Fig. S2** The statistical analysis of the data of reproducibility and current distribution of devices based on (a)TPPT, (b)TPPA, (c) <sup>t</sup>Bu-TPPT, and (d) <sup>t</sup>Bu-TPPA (64 cells for each device).

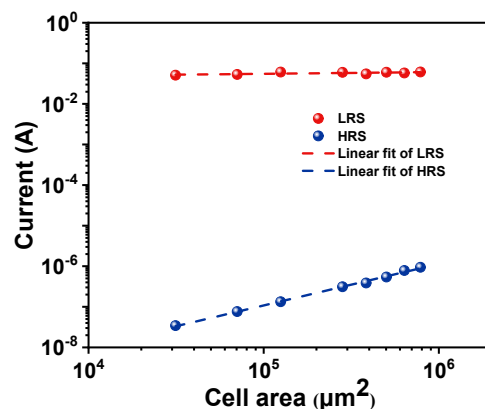

**Fig. S3** The relationship of cell area and current in LRS (red) and HRS (blue), respectively (Insert is the photo of as-fabricated mask-type device).

**Table S1** The photophysical properties for BPPT, TPPT, TPPA, <sup>t</sup>Bu-TPPT and <sup>t</sup>Bu-TPPA.

| Molecules                   |          | BPPT | TPPT | TPPA    | <sup>t</sup> Bu-TPPT | <sup>t</sup> Bu-TPPA |
|-----------------------------|----------|------|------|---------|----------------------|----------------------|
| $\lambda_{\text{abs}}$ (nm) | Solution | 310  | 334  | 273/367 | 347                  | 278/368              |
|                             | Film     | 310  | 335  | 277/371 | 349                  | 300/389              |

**Table S2** Photophysical and electrochemical properties of BPPT, TPPT, TPPA, <sup>t</sup>Bu-TPPT and <sup>t</sup>Bu-TPPA.

| Molecules                  | $\lambda_{\text{onset}}^{\text{a}}$ (nm) | $E_{\text{ox}}^{\text{b}}$ (V) | $E_{\text{g}}^{\text{c}}$ (eV) | HOMO <sup>d</sup> (eV) | LUMO <sup>d</sup> (eV) |
|----------------------------|------------------------------------------|--------------------------------|--------------------------------|------------------------|------------------------|
| <b>BPPT</b>                | 344                                      | 1.45                           | 3.60                           | -5.93                  | -2.33                  |
| <b>TPPT</b>                | 374                                      | 1.41                           | 3.32                           | -5.89                  | -2.57                  |
| <b><sup>t</sup>Bu-TPPT</b> | 383                                      | 1.60                           | 3.24                           | -6.08                  | -2.84                  |
| <b>TPPA</b>                | 400                                      | 0.86                           | 3.10                           | -5.34                  | -2.24                  |
| <b><sup>t</sup>Bu-TPPA</b> | 403                                      | 0.91                           | 3.07                           | -5.39                  | -2.32                  |

<sup>a</sup> THF measurement.

<sup>b</sup> Calculated using CV.

<sup>c</sup> Calculated from onset of the absorption spectra ( $E_{\text{g}} = 1240/\lambda_{\text{onset}}$ ).

<sup>d</sup> The HOMO and LUMO energy levels measured against ferrocene were calculated using the following equations:  $E_{\text{HOMO}} = [E_{\text{ox}} - E_{\text{Fc}} + 4.8]$ ,  $E_{\text{LUMO}} = [E_{\text{HOMO}} - E_{\text{g}}]$ .

**Table S3** Statistic results of the star-shaped molecules-based memory devices.

| Devices                           | BPPT | TPPT               | TPPA               | <sup>t</sup> Bu-TPPT | <sup>t</sup> Bu-TPPA |
|-----------------------------------|------|--------------------|--------------------|----------------------|----------------------|
| V <sub>th</sub> (V)               | —    | 1.60               | 1.50               | 1.50                 | 1.45                 |
| I <sub>ON</sub> /I <sub>OFF</sub> | —    | 10 <sup>2</sup> :1 | 10 <sup>3</sup> :1 | 10 <sup>4</sup> :1   | 10 <sup>5</sup> :1   |
